# Supplementary material
Source: PubMed Central journal article supplement (PMC4150851)
Supplement: NIHMS611981-supplement-05.pdf [file NIHMS611981-supplement-05.pdf]

19 **Supplementary Figure 1:** Representative gross morphology of the osteochondral defects after  
20 12 weeks from the (a) MSC/MSC group, (b) the MSC/OS group, (c) the CG7/OS group, and (d)  
21 the CG14/OS group. Defects are indicated with a white circle. It should be noted that the white  
22 circles are only indicative and do not reflect the actual dimensions of the defect. (e) H&E section  
23 showing the partially degraded hydrogel particulates encapsulated in fibrous tissue, as indicated

- 1 by arrows, typically found remaining in the subchondral defect region of samples. This particular
- 2 sample is from the MSC/MS group.

ACCEPTED MANUSCRIPT
